# Supplementary material for: Secoiridoids Metabolism Response to Wounding in Common Centaury (Centaurium erythraea Rafn) Leaves
Source: MDPI journal article supplement (doi:10.3390/plants8120589), 2019-12-11
Supplement: s1 [file s1]

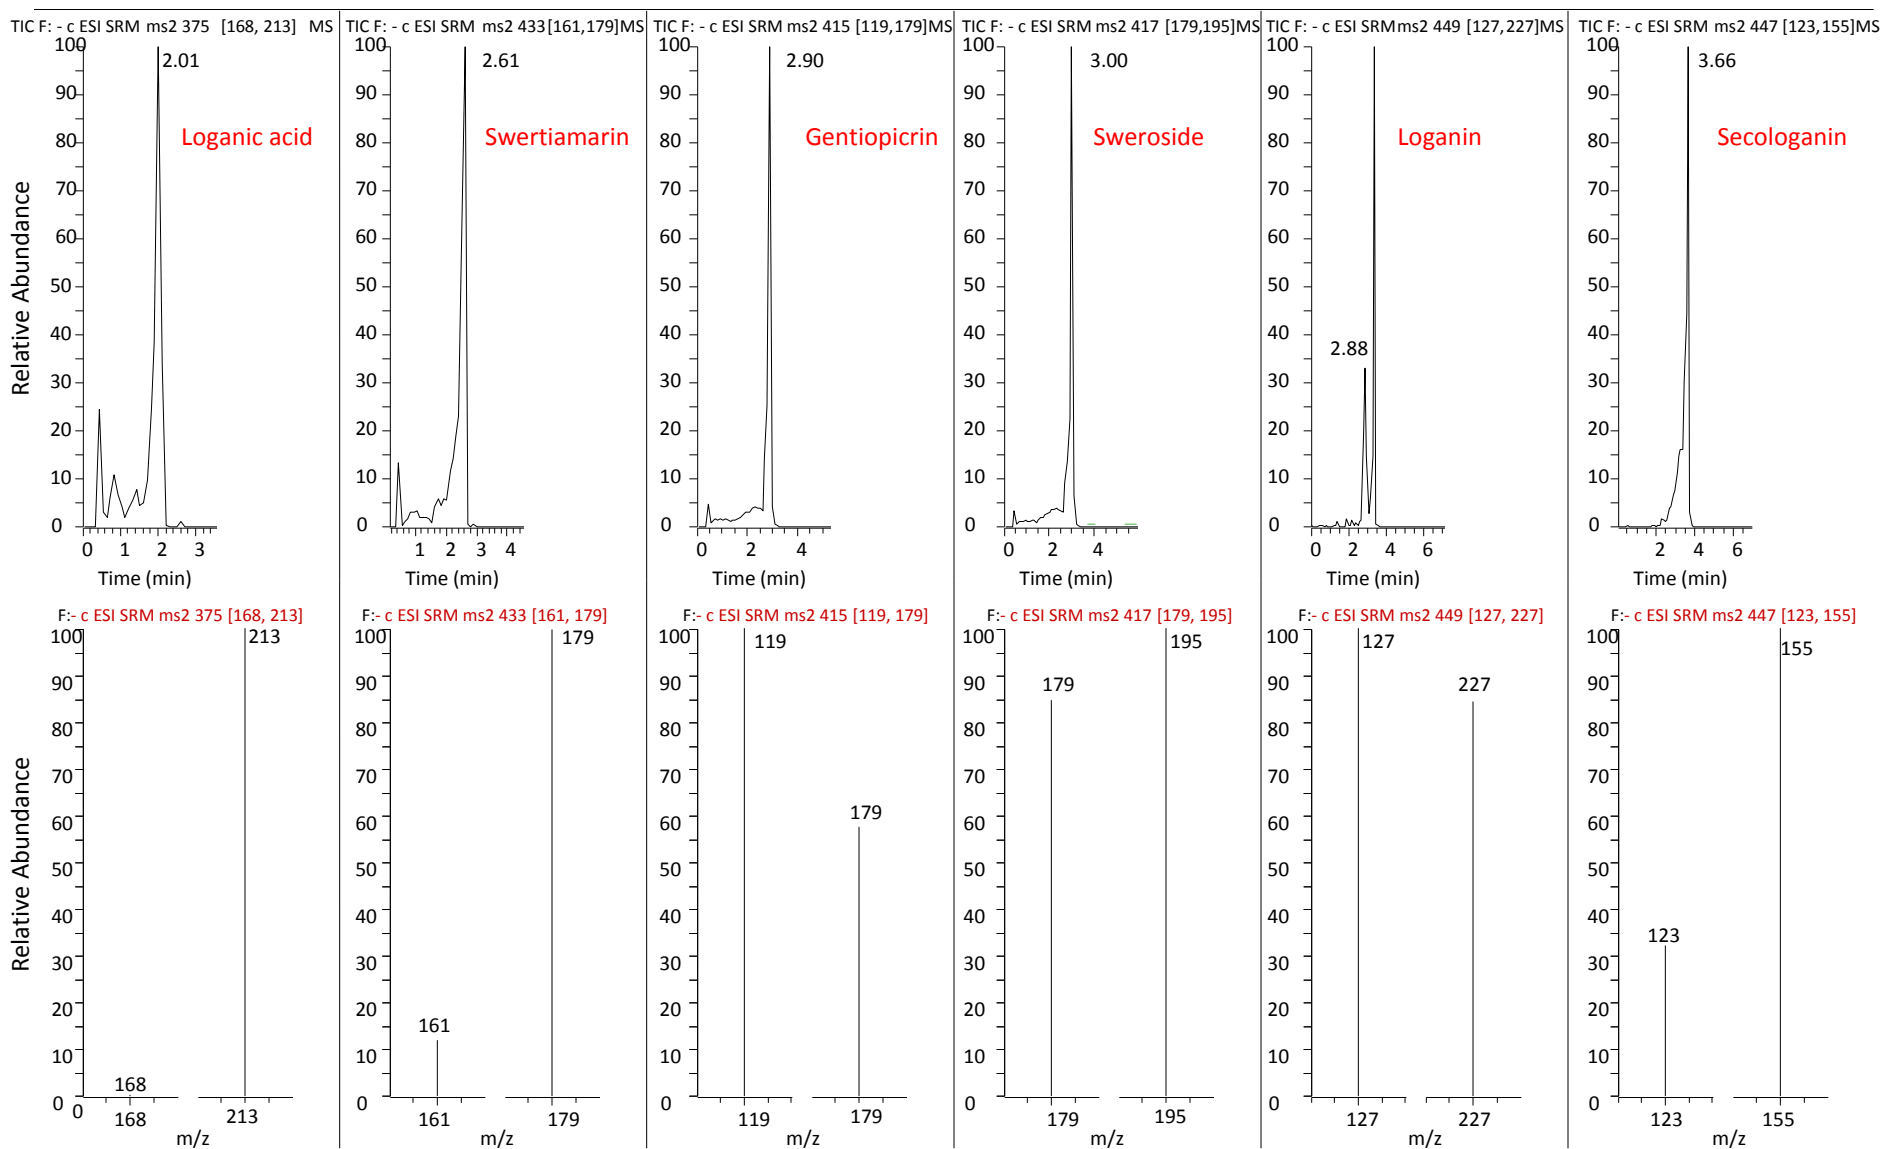

**Figure S1.** SRM (Single Reaction Monitoring) UHPLC-MS<sup>2</sup> chromatograms of targeted compounds (loganic acid, loganin, secologanin, sweroside, swertiamarin and gentiopicroin) and their corresponding MS<sup>2</sup> spectra.
