# Supplementary material for: Secoiridoids Metabolism Response to Wounding in Common Centaury (Centaurium erythraea Rafn) Leaves
Source: MDPI journal article supplement (doi:10.3390/plants8120589), 2019-12-11
Supplement: s1 [file s1]

**Table S1.** Iridoids identified in methanol extracts of *Centaurium erythraea* by UHPLC/DAD/ $\pm$ HESI-MS<sup>2</sup> analysis. Peak labels, retention times ( $t_R$ ), parent ions  $[M+CH_3COOH+H]^+$   $m/z$ , MS<sup>2</sup> fragments used in an SRM (Single Reaction Monitoring) experiment, collision energies (cE), and  $\lambda_{max}$  for each of the compounds are presented.

| UHPLC-MS data |                             |             |                          |                                                   |         | UHPLC-DAD data |                      |
|---------------|-----------------------------|-------------|--------------------------|---------------------------------------------------|---------|----------------|----------------------|
| Peak No.      | Assignment                  | $t_R$ (min) | $[M+CH_3COOH+H]^+$ $m/z$ | SRM MS <sup>2</sup> fragments $[m/z$ (Intensity)] | cE (eV) | $t_R$ (min)    | $\lambda_{max}$ [nm] |
| 1             | Loganic acid <sup>S,R</sup> | 2.01        | 375                      | 213 (100), 168 (<5)                               | 20      | 1.95           | 240                  |
| 5             | Swertiamarin <sup>S,R</sup> | 2.61        | 433                      | 179 (100); 161 (15)                               | 20      | 2.52           | 240                  |
| 2             | Loganin <sup>S,R</sup>      | 2.88        | 449                      | 227 (85); 127 (100)                               | 30      | 2.85           | 240                  |
| 6             | Gentiopicrin <sup>S,R</sup> | 2.90        | 415                      | 179 (60); 119 (100)                               | 20      | 2.83           | 250, 280, 370        |
| 4             | Sweroside <sup>S,R</sup>    | 3.00        | 417                      | 195 (100); 179 (85)                               | 20      | 2.94           | 250                  |
| 3             | Secologanin <sup>S,R</sup>  | 3.66        | 447                      | 155 (100); 123 (30)                               | 30      | 3.58           | 240                  |

<sup>S</sup>Confirmed using reference standards

<sup>R</sup>Confirmed according to the literature

**Table S2.** Primer sequences used for the qPCR analysis (for other SGs metabolic pathway genes primer sets please refer to [4])

| Genes         |   | Primers (5' to 3')          |
|---------------|---|-----------------------------|
| <i>CeIS2</i>  | F | CAAGCCATTGGTGTATCCAG        |
|               | R | CACTTGATTCTTCGCCTTGG        |
| <i>CeCOI1</i> | F | CATCAGGAAATGCACACGAT        |
|               | R | GTGCCCAGCCAGTGAATAGT        |
| <i>CeJAZ1</i> | F | TTGCTGATTCCGGTAGGTTT        |
|               | R | TGAATTTCTCCACCTGACC         |
| <i>CeBIS1</i> | F | GCTTAATCTTACAGTTACAAGCACAAA |
|               | R | CTACTTGAGTTGGGCGTTGG        |
| <i>CeMYC2</i> | F | CCGAAAAGCAAGACTTGAGG        |
|               | R | TGGCTGCTGATGACTTGATG        |
| <i>CeJAM2</i> | F | ATGCAGGGACTTGTCAATGG        |
|               | R | AGCCCTCAACATCTGAATGC        |
| <i>CeJAM3</i> | F | TTCTCCGAAGGTGGAAGATG        |
|               | R | GCTCCAAGGTAGAAATCATGG       |
| <i>CeEF1</i>  | F | AGATGCACCATGAAGCCCTC        |
|               | R | GATGACCTGGGAGGTGAAGC        |

F, forward primer; R, reverse primer

**Table S3.** Results of factorial ANOVA on gene expression data in leaves of *C. erythraea* upon wounding. Factor **time** included all time points in hours upon wounding (HAW) as in figures 2 and 3 of the Manuscript. Factor **leaf type** represents wounded (LL - local leaves) and unwounded leaves (SL - systemic leaves) as indicated in Manuscript. **Time x leaf type** represents interaction term in factorial ANOVA. Since ANOVA residuals were heteroscedastic in several cases to stabilize the variance Box-Cox transformation was applied prior to ANOVA; this is indicated in the Box-Cox trans column. The asterisks denote the level of statistical significance: \* < 0.05, \*\* < 0.01 and \*\*\* < 0.001.

| Gene           | Box-Cox trans | time | leaf type | time x leaf type |
|----------------|---------------|------|-----------|------------------|
| <i>CeGPPS</i>  | log           | ***  |           |                  |
| <i>CeGES</i>   | log           | ***  |           |                  |
| <i>CeG8O</i>   | log           | ***  |           |                  |
| <i>Ce8HGO</i>  | sqrt          | ***  |           |                  |
| <i>CeIS2</i>   | log           | ***  |           |                  |
| <i>CeIO</i>    | none          | ***  |           |                  |
| <i>Ce7DLGT</i> | sqrt          | ***  |           |                  |
| <i>Ce7DLH2</i> | none          | ***  |           |                  |
| <i>CeSLS</i>   | sqrt          | ***  |           |                  |
| <i>CeCOI1</i>  | sqrt          | ***  |           |                  |
| <i>CeJAZ1</i>  | none          | ***  | **        | *                |
| <i>CeMYC2</i>  | none          |      | *         |                  |
| <i>CeBIS1</i>  | 1/sqrt        | ***  |           |                  |
| <i>CeJAM2</i>  | none          | ***  |           |                  |
| <i>CeJAM3</i>  | none          | **   |           |                  |
| <i>CeIS1</i>   | none          | **   |           |                  |
